# Supplementary material for: Introducing the new concept of a chiral-polaron giant-IRAV signature, optical-active giant-response in vibrational circular dichroism
Source: Royal Society of Chemistry journal article supplement (doi:10.1039/d4cp02876g), 2024-01-01
Supplement: d4cp02876g1.pdf [file d4cp02876g1.pdf]

## SUPPORTING INFORMATION

### Introducing the new concept of *chiral-polaron giant-IRAV signature*.

### Optical-active giant-response in vibrational circular dichroism.

Fabio Biffoli,<sup>[1,2]</sup> Marco Bonechi,<sup>[1,3]</sup> Marco Pagliai,<sup>[1]</sup> Massimo Innocenti,<sup>[1,3,4,5]</sup> Roberto Giovanardi,<sup>[6]</sup> and Claudio Fontanesi\*<sup>[3,6]</sup>

<sup>1</sup>*Department of Chemistry, “Ugo Schiff”, University of Firenze, via della Lastruccia 3, 50019 Sesto Fiorentino, ITALY.*

<sup>2</sup>*Materia Firenze Lab s.r.l., Gruppo Materia Firenze, Via delle Fonti 8/E, 50018 Scandicci (FI), Italy.*

<sup>3</sup>*National Interuniversity Consortium of Materials Science and Technology (INSTM), Via G. Giusti 9, 50121 Firenze (FI), Italy.*

<sup>4</sup>*National Research Council-Organometallic Compounds Chemistry Institute (CNR-ICCOM), Via Madonna del Piano 10, 50019 Sesto Fiorentino (FI), Italy*

<sup>5</sup>*Center for Colloid and Surface Science (CSGI), Via della Lastruccia 3, 50019 Sesto Fiorentino (FI), Italy*

<sup>6</sup>*Department of Engineering “Enzo Ferrari”, (DIEF), University of Modena and Reggio Emilia, Via Vivarelli 10, 41125 Modena, Italy.*

## Index

### Section 1

In this section are reported all the relevant spectra that are not present in the main text. Specifically Figure S1.1-S1.6 are dedicated to linear PAHs and Figures S1.7-S1.3 to four ringed PAHs; tetracene IR and UV-Vis LC-BLYP are reported in Figure S10. Finally LC-BLYP VCD spectra of [4]helicene are reported in Figure S1.11.

### Section 2

In this section are reported all the relevant numerical values, especially  $\rho_{\text{IR}}$ , that are not present in the main text. Specifically, Table S2.1 is dedicated to linear PAHs and Table S2.2 is reserved to nonlinear PAHs and tetracene. Finally, Table S2.3 displays the results on the  $\omega$  parameter, both for CAM-B3LYP and LC-BLYP, for tetracene.

### Section 3

Constrained DFT (CDFT) results

### Section 4

Equation 2: Energy vs. box length

## Section 1

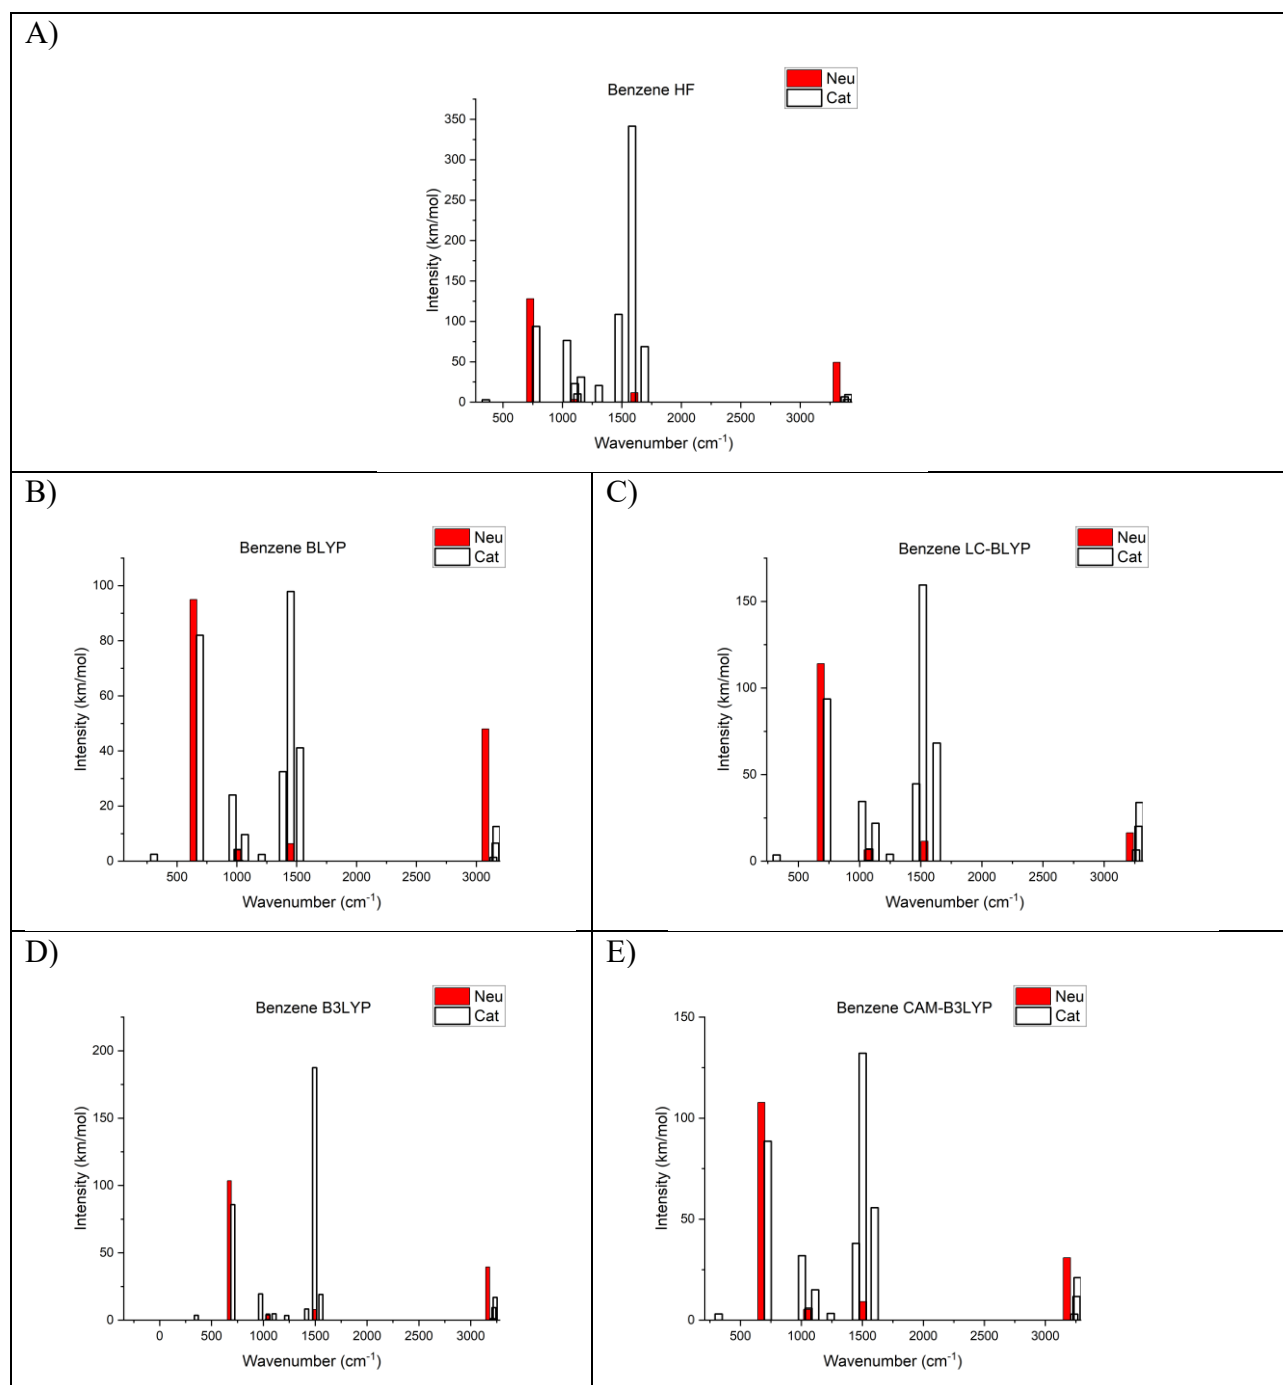

**Figure S1.1.** Benzene IR neutral (red bar) and cation (black bar) spectra. A) HF B) BLYP C) LC-BLYP D) B3LYP E) CAM-B3LYP.

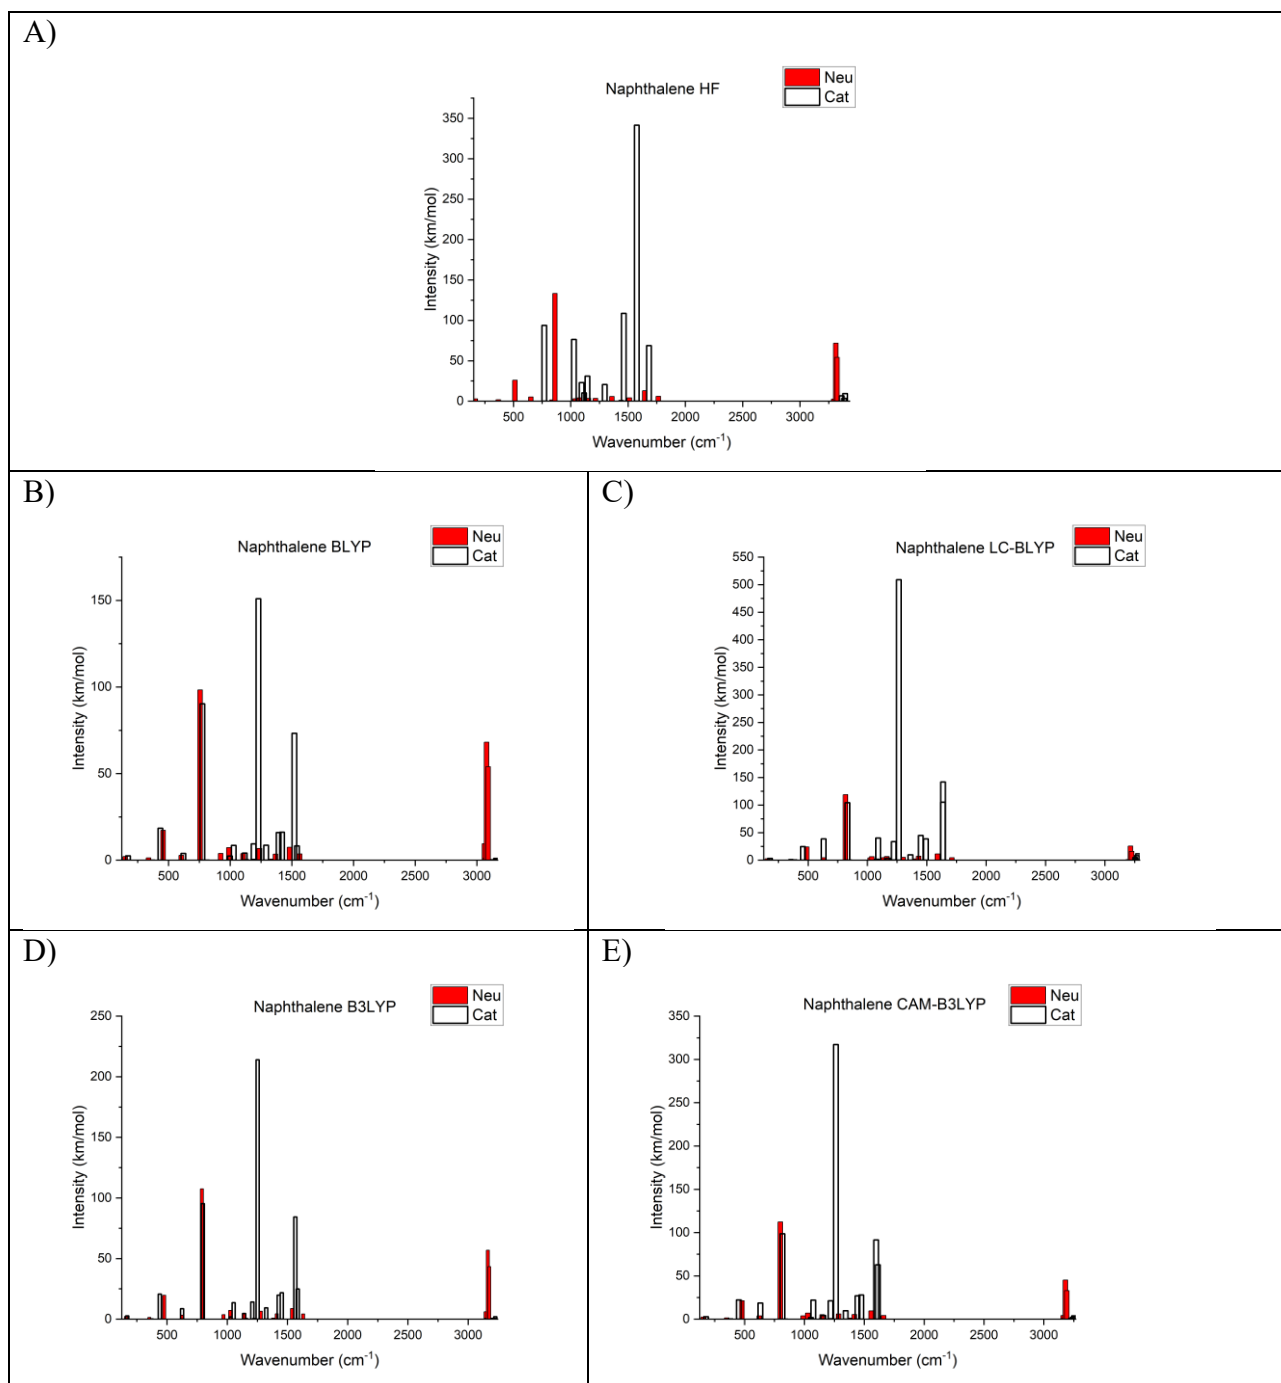

**Figure S1.2.** Napthalene IR neutral (red bar) and cation (black bar) spectra. A) HF B) BLYP C) LC-BLYP D) B3LYP E) CAM-B3LYP.

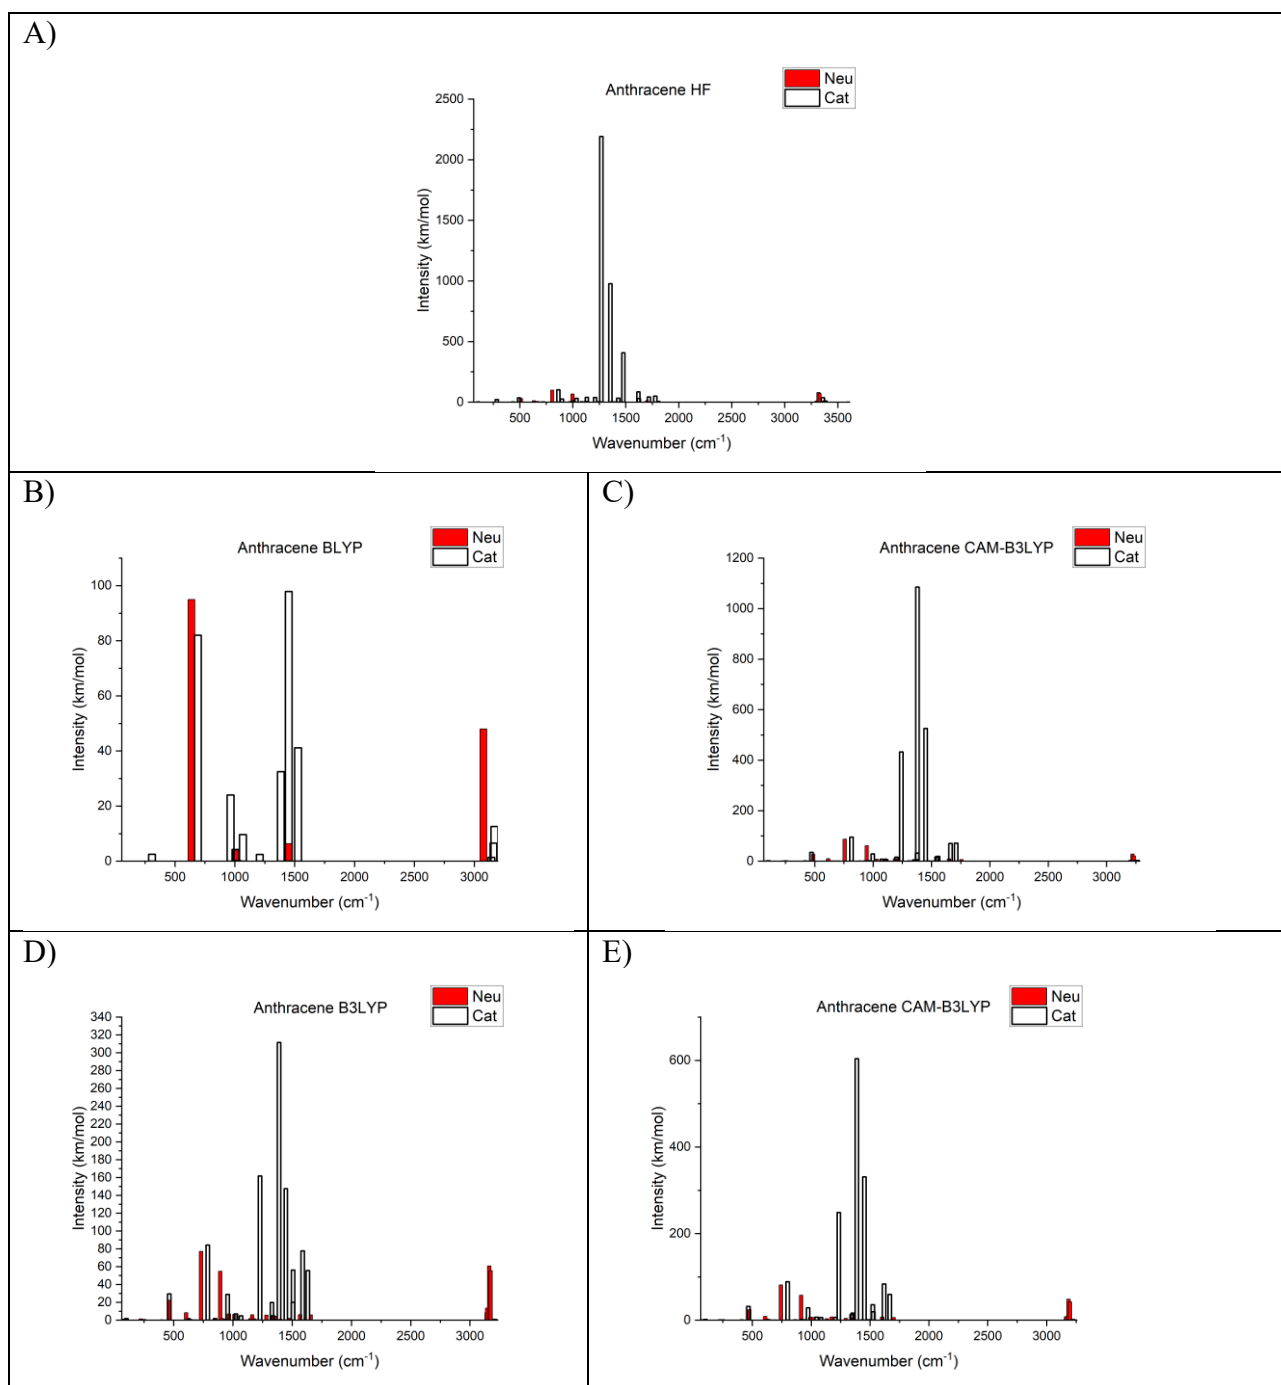

**Figure S1.3.** Anthracene IR neutral (red bar) and cation (black bar) spectra. A) HF B) BLYP C) LC-BLYP D) B3LYP E) CAM-B3LYP.

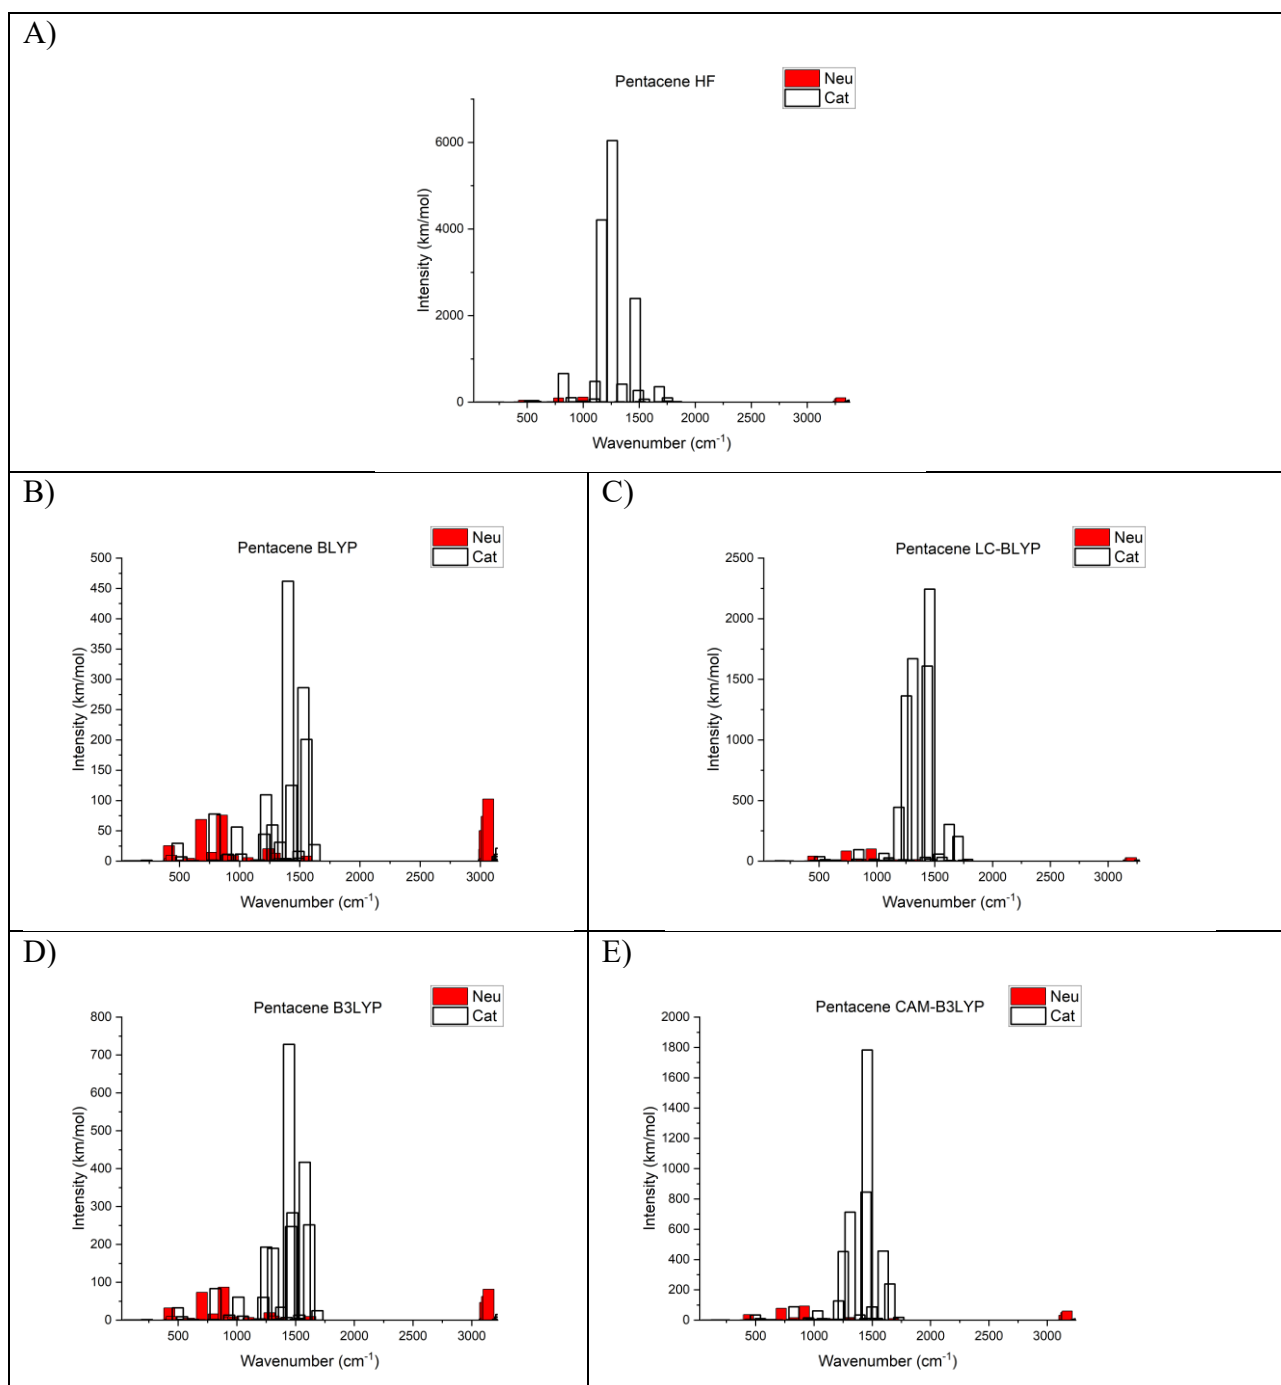

**Figure S1.4.** Pentacene IR neutral (red bar) and cation (black bar) spectra. A) HF B) BLYP C) LC-BLYP D) B3LYP E) CAM-B3LYP.

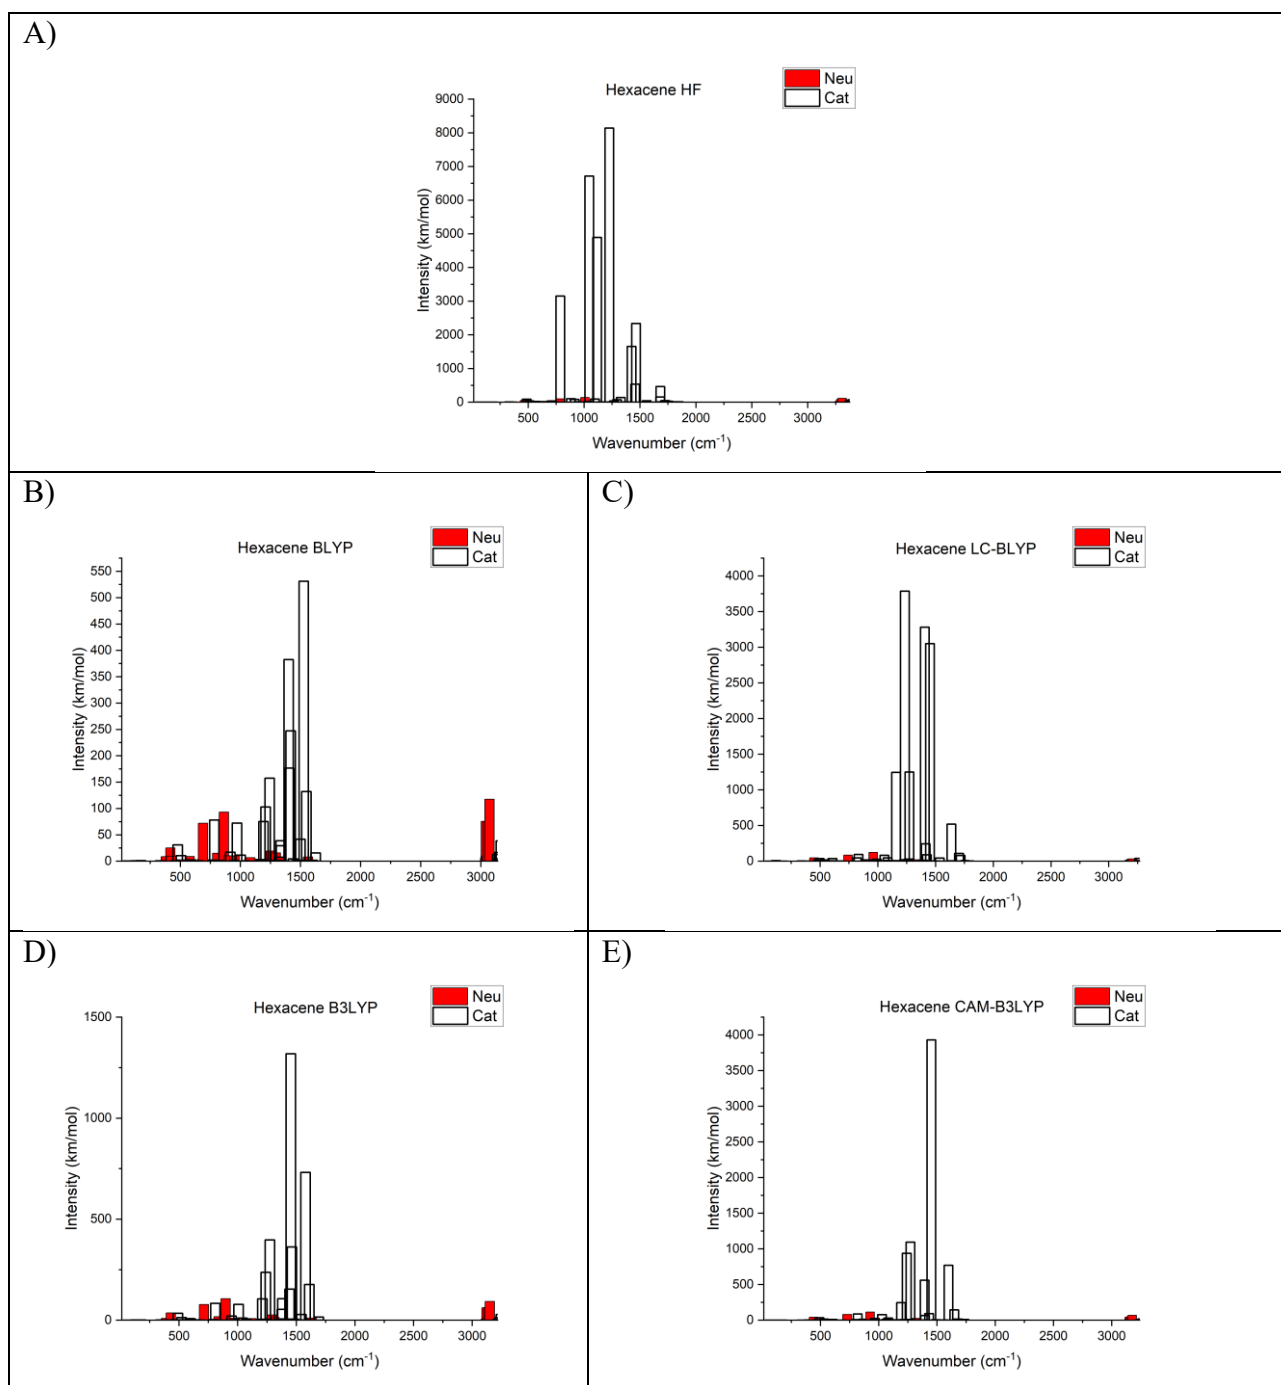

**Figure S1.5.** Hexacene IR neutral (red bar) and cation (black bar) spectra. A) HF B) BLYP C) LC-BLYP D) B3LYP E) CAM-B3LYP.

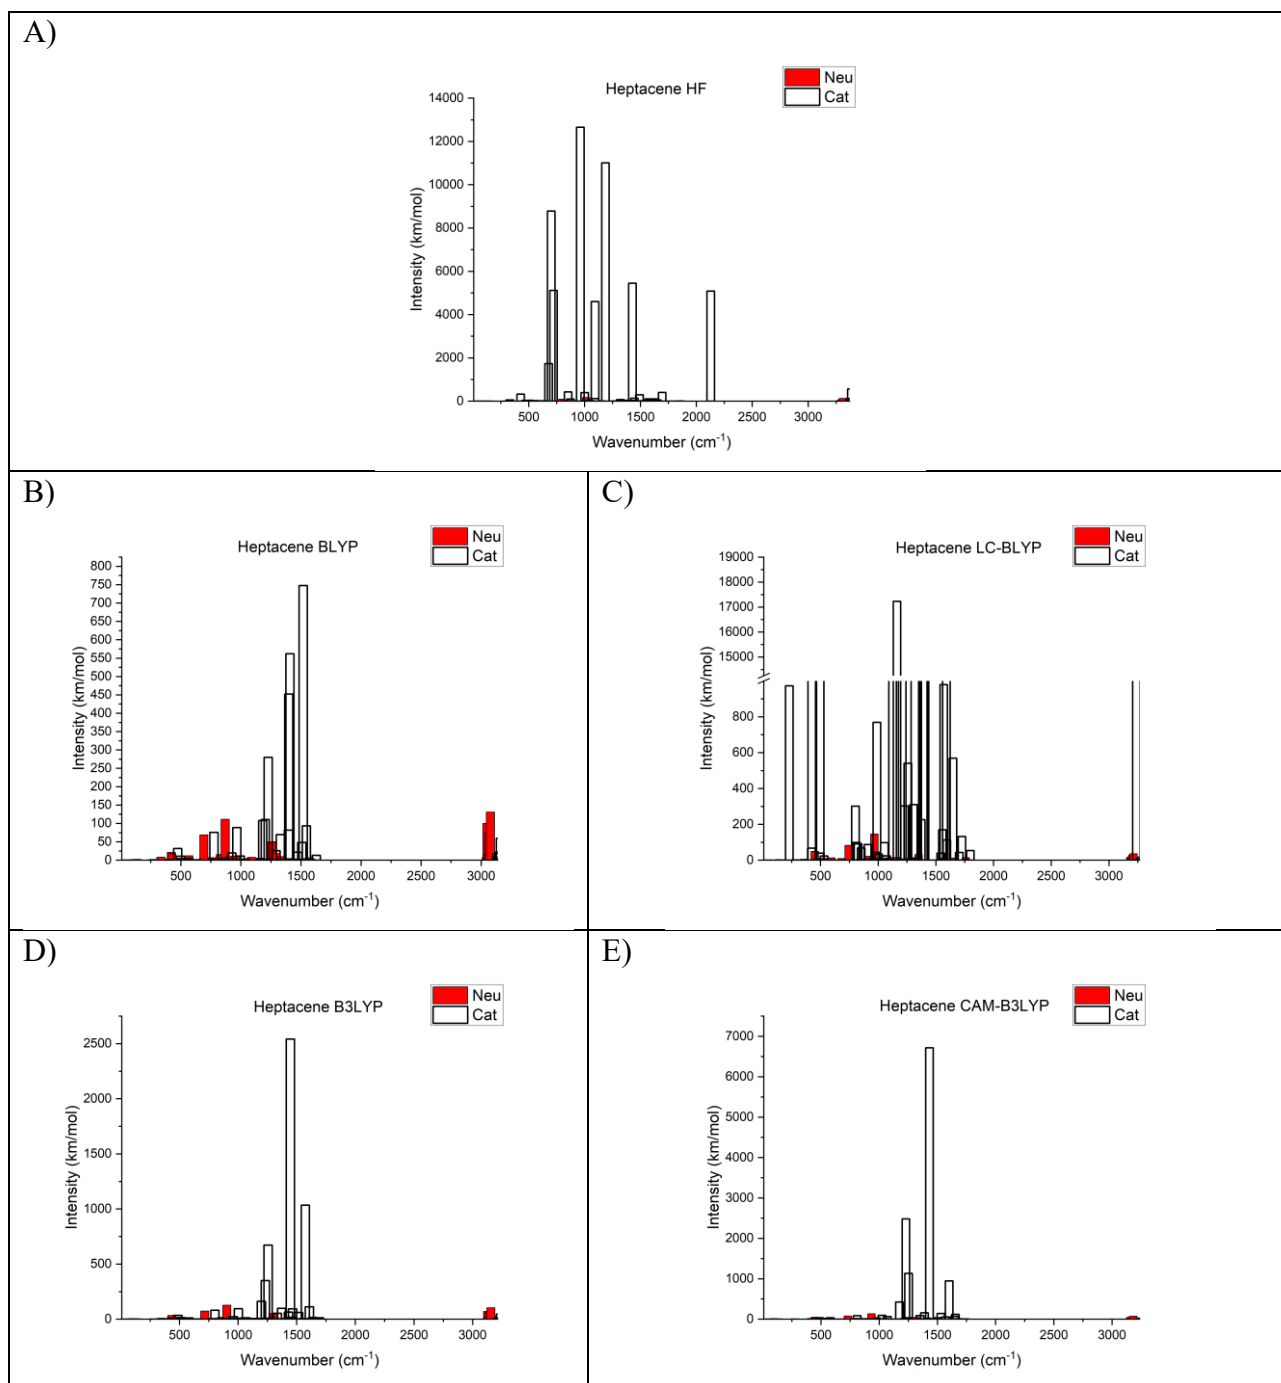

**Figure S1.6.** Heptacene IR neutral (red bar) and cation (black bar) spectra. A) HF B) BLYP C) LC-BLYP D) B3LYP E) CAM-B3LYP.

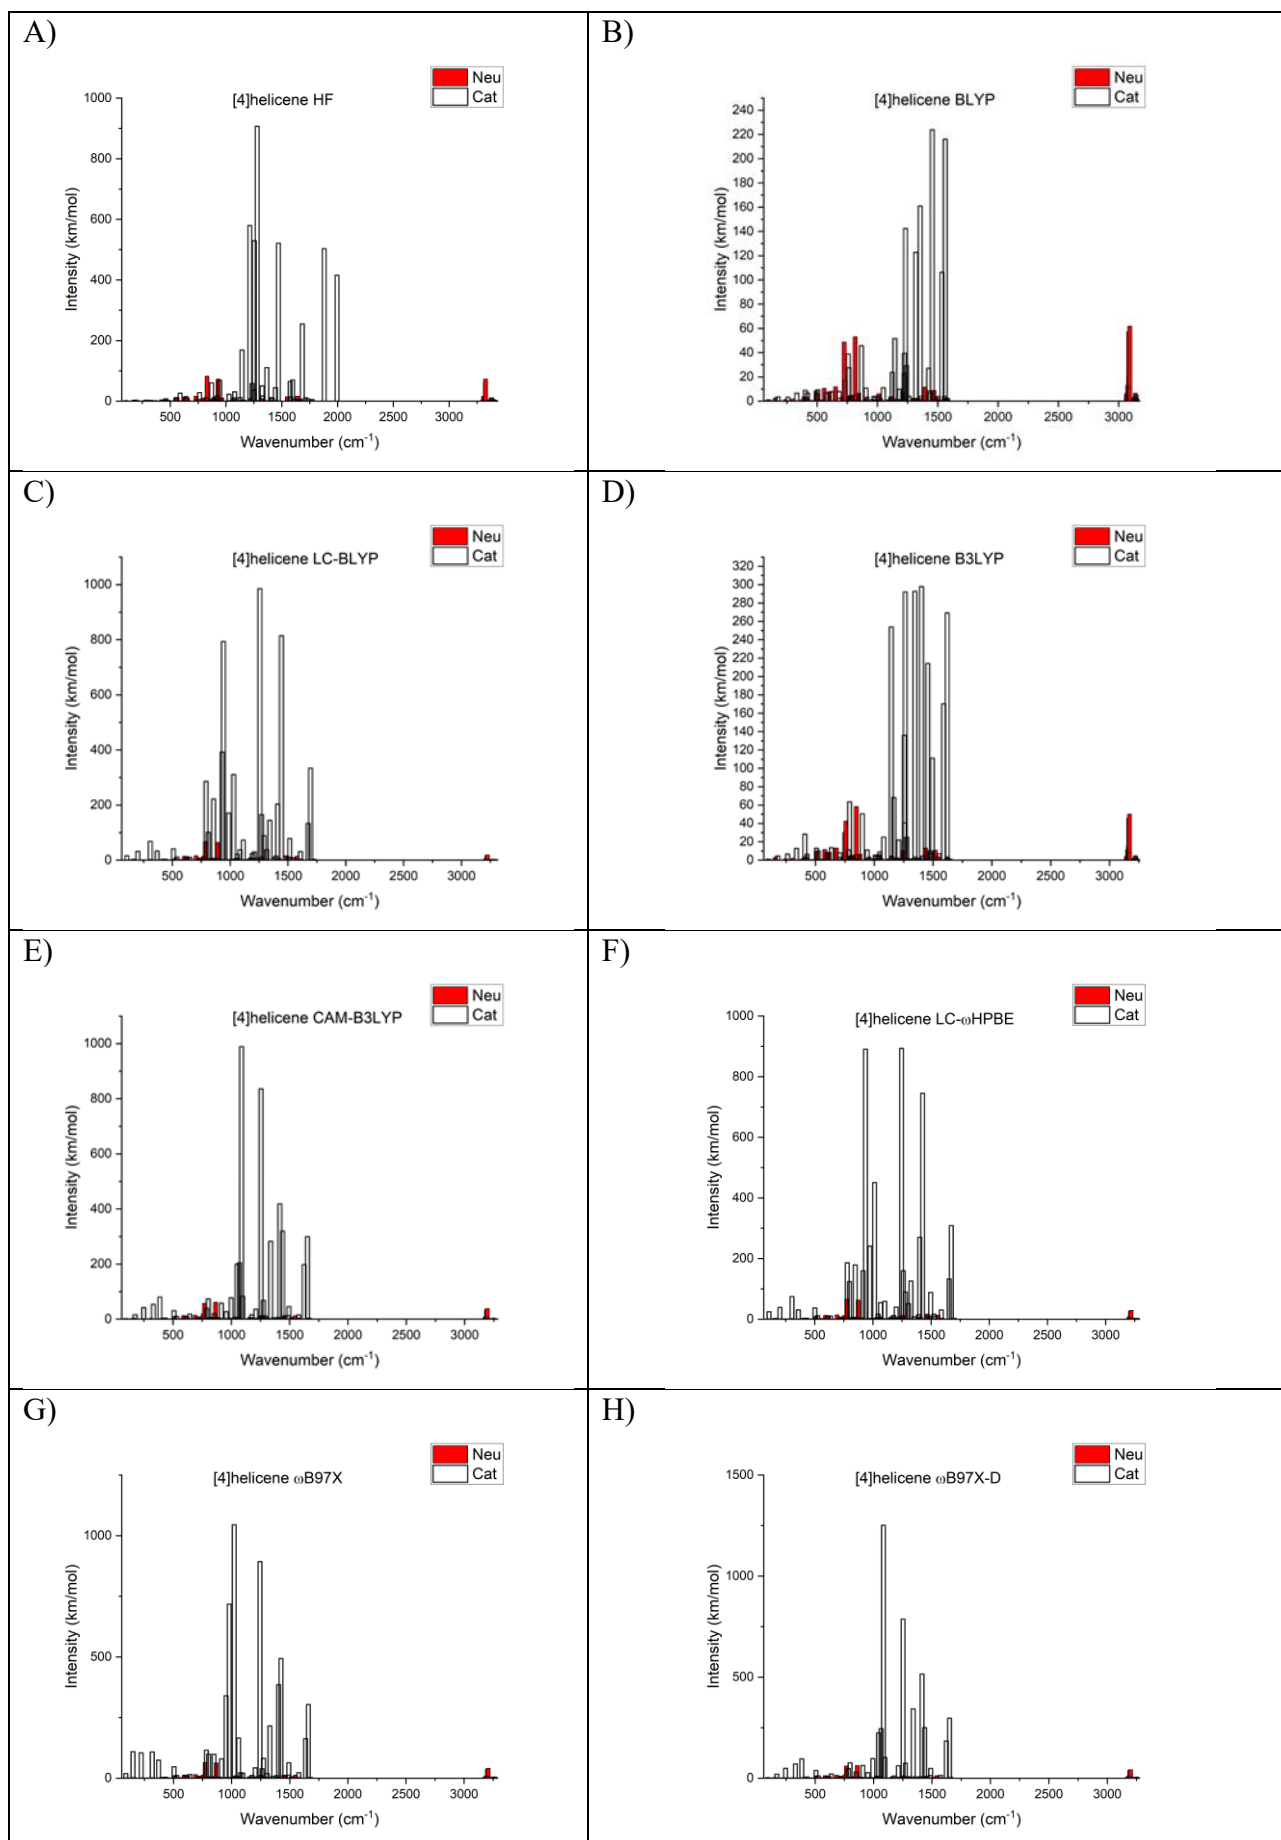

**Figure S1.7.** [4]helicene IR neutral (red bar) and cation (black bar) spectra. A) HF B) BLYP C) LC-BLYP D) B3LYP E) CAM-B3LYP.



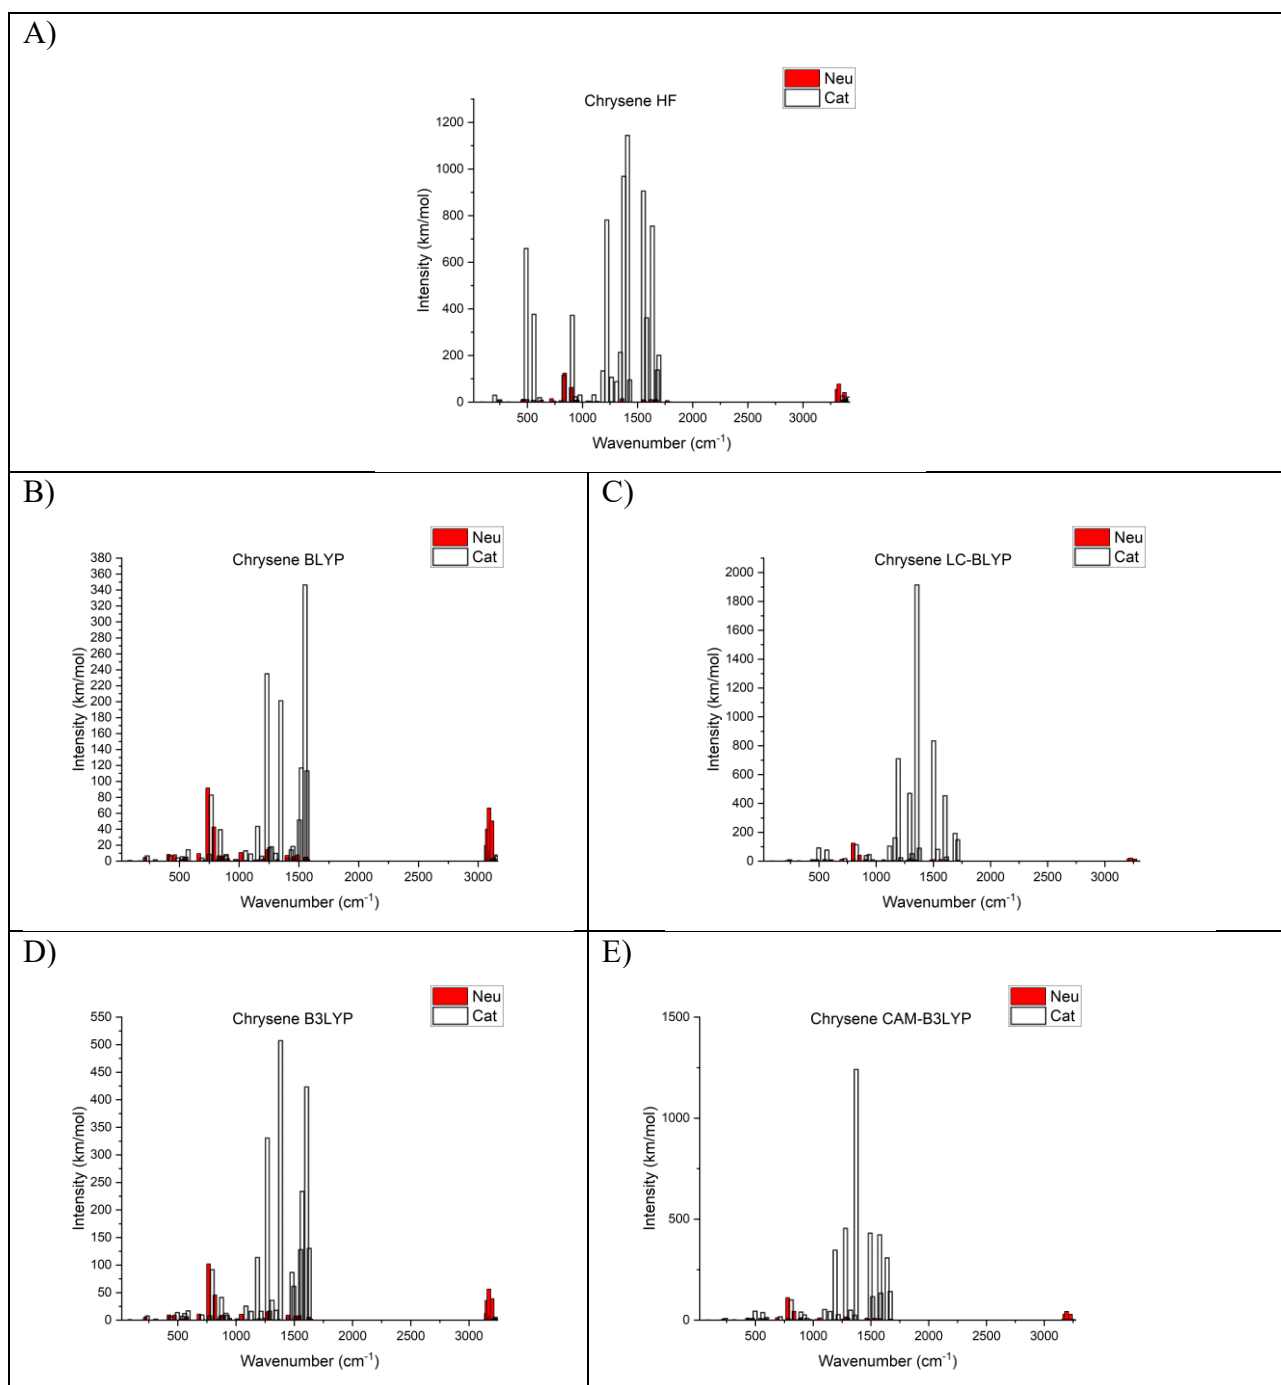

**Figure S1.8.** Chrysene IR neutral (red bar) and cation (black bar) spectra. A) HF B) BLYP C) LC-BLYP D) B3LYP E) CAM-B3LYP.

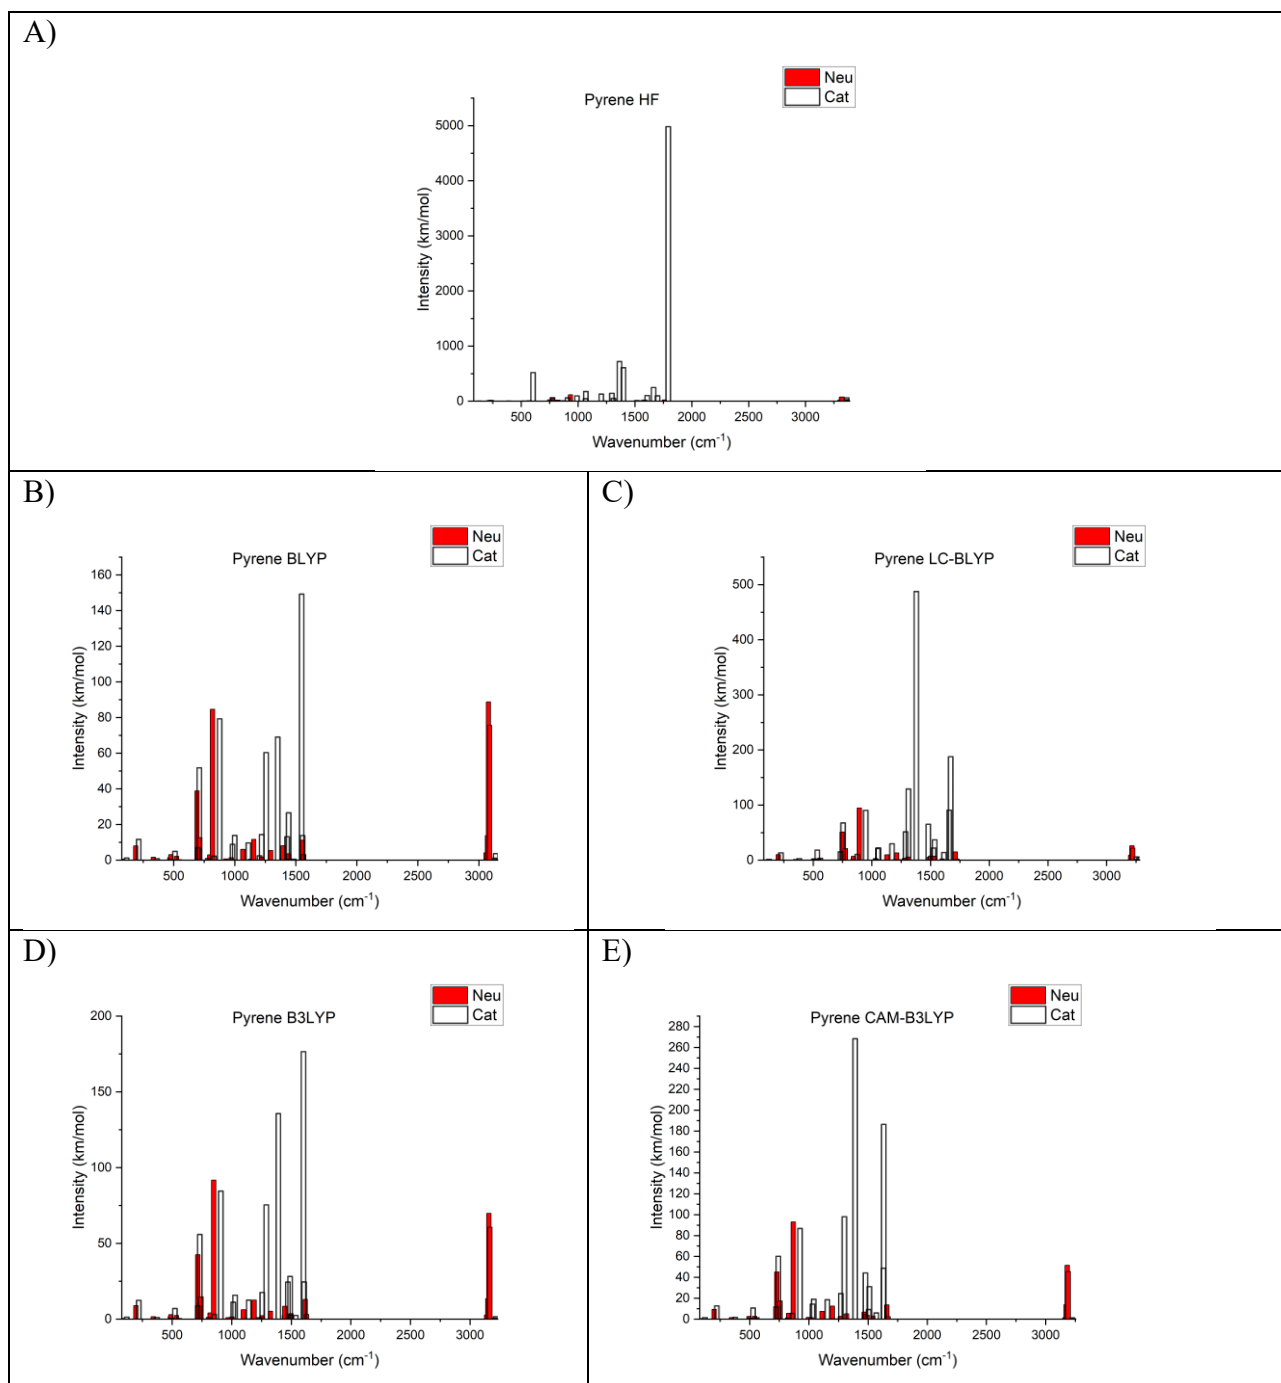

**Figure S1.9.** Pyrene IR neutral (red bar) and cation (black bar) spectra. A) HF B) BLYP C) LC-BLYP D) B3LYP E) CAM-B3LYP.

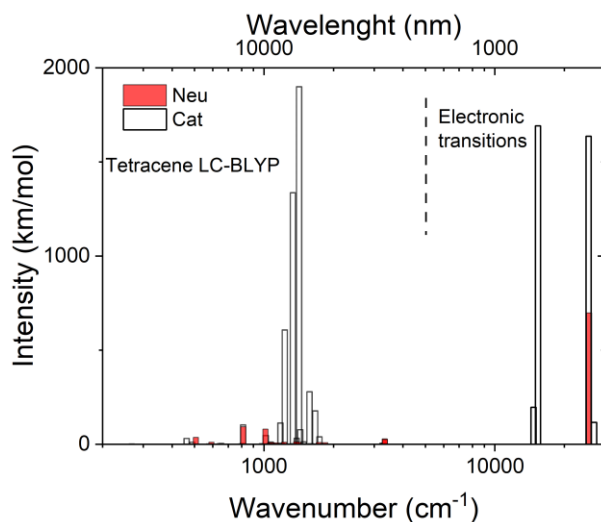

**Figure S1.10.** LC-BLYP/cc-pVTZ Tetracene IR and UV-Vis spectra neutral (red bar) and cation (black bar) species shown in the same graph, the dashed vertical line marks the boundary between vibrational (left of the dashed vertical line) and electronic (right of the dashed vertical line) spectra.

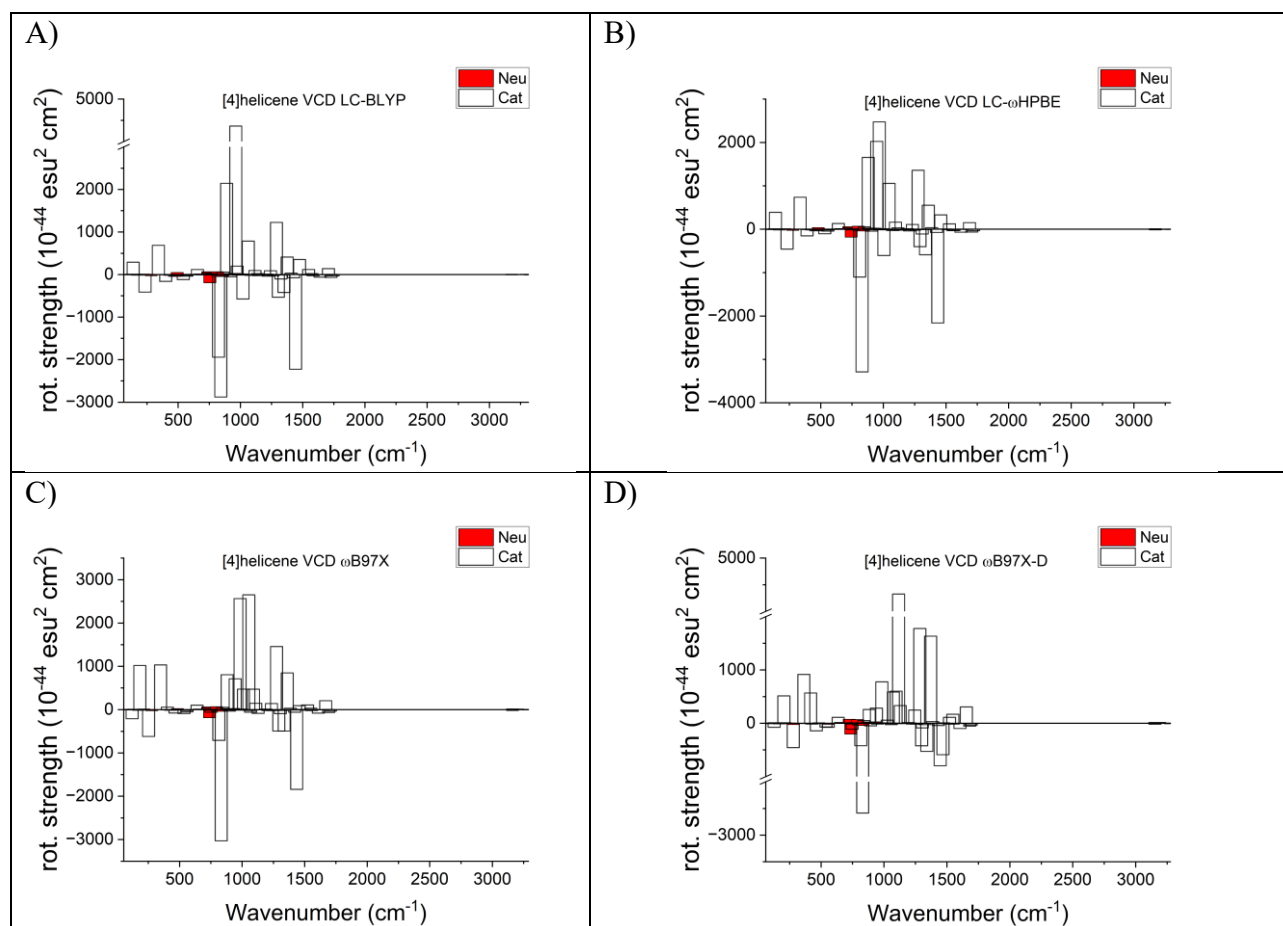

**Figure S1.11.** [4]helicene VCD neutral (red bar) and cation (black bar) spectra. A) LC-BLYP B) LC- $\omega$ HPBE C)  $\omega$ B97X D)  $\omega$ B97X-D.

## Section 2

**Table S2.1.** Summary of  $\rho_{\text{IR}}$  related to linear PAHs at different exchange and correlation functionals.

| Species     | x/cc-pVTZ | $\rho_{\text{IR}}$ |
|-------------|-----------|--------------------|
| Benzene     | CAM-B3LYP | 1.23               |
| -           | B3LYP     | 1.81               |
| -           | LC-BLYP   | 1.40               |
| -           | BLYP      | 1.03               |
| -           | HF        | 2.67               |
| Naphthalene | CAM-B3LYP | 2.83               |
| -           | B3LYP     | 1.99               |
| -           | LC-BLYP   | 4.28               |
| -           | BLYP      | 1.54               |
| -           | HF        | 2.56               |
| Anthracene  | CAM-B3LYP | 7.44               |
| -           | B3LYP     | 4.04               |
| -           | LC-BLYP   | 12.48              |
| -           | BLYP      | 2.48               |
| -           | HF        | 22.13              |
| Tetracene   | CAM-B3LYP | 11.64              |
| -           | B3LYP     | 6.81               |
| -           | LC-BLYP   | 20.51              |
| -           | BLYP      | 3.8                |
| -           | HF        | 46.13              |
| Hexacene    | CAM-B3LYP | 34.53              |
| -           | B3LYP     | 12.43              |
| -           | LC-BLYP   | 30.76              |
| -           | BLYP      | 4.52               |
| -           | HF        | 58.14              |
| Heptacene   | CAM-B3LYP | 49.90              |
| -           | B3LYP     | 20.17              |
| -           | LC-BLYP   | 119.48             |
| -           | BLYP      | 5.71               |
| -           | HF        | 76.49              |

**Table S2.2.** Summary of  $\rho_{\text{IR}}$ , symmetry, HOMO-LUMO and HOMO-SOMO delta related to four ringed PAHs at different exchange and correlation functionals.

| Species    | x/cc-pVTZ | $\rho_{\text{IR}}$ | delta HOMO LUMO | delta SOMO LUMO | Symmetry |
|------------|-----------|--------------------|-----------------|-----------------|----------|
| Tetracene  | CAM-B3LYP | 11.64              | 0.18465         | 0.12988         | D2h      |
| -          | B3LYP     | 6.81               | 0.10154         | 0.05132         | D2h      |
| -          | LC-BLYP   | 20.51              | 0.2646          | 0.20507         | D2h      |
| -          | BLYP      | 3.8                | 0.05975         | 0.01268         | D2h      |
| -          | HF        | 46.13              | 0.28377         | 0.25198         | D2h      |
| Pyrene     | CAM-B3LYP | 2.88               | 0.22721         | 0.13678         | D2h      |
| -          | B3LYP     | 1.92               | 0.14128         | 0.05578         | D2h      |
| -          | LC-BLYP   | 5.15               | 0.31018         | 0.21545         | D2h      |
| -          | BLYP      | 1.76               | 0.09593         | 0.01465         | D2h      |
| -          | HF        | 42.72              | 0.33069         | 0.26748         | D2h      |
| Chrysene   | CAM-B3LYP | 11.17              | 0.24595         | 0.13071         | C2h      |
| -          | B3LYP     | 4.96               | 0.1561          | 0.04999         | C2h      |
| -          | LC-BLYP   | 15.37              | 0.33182         | 0.21041         | C2h      |
| -          | BLYP      | 3.78               | 0.10781         | 0.01106         | C2h      |
| -          | HF        | 9.21               | 0.35301         | 0.2601          | C2h      |
| 4-Helicene | CAM-B3LYP | 16.20              | 0.24373         | 0.13231         | C2       |
| -          | B3LYP     | 5.10               | 0.1544          | 0.0518          | C2       |
| -          | LC-BLYP   | 14.62              | 0.32837         | 0.2095          | C2       |
| -          | BLYP      | 4.22               | 0.10653         | 0.01208         | C2       |
| -          | HF        | 11.04              | 0.34832         | 0.24033         | C2       |

**Table S2.3.** Summary of tetracene  $\rho_{\text{IR}}$ , at varying the omega parameter in LC-BLYP and CAM-B3LYP functionals.

| Functional | $\omega$ | $\rho_{\text{IR}}$ |
|------------|----------|--------------------|
| CAM-B3LYP  | 0        | 6.81               |
| CAM-B3LYP  | 0.15     | 8.45               |
| CAM-B3LYP  | 0.33     | 11.64              |
| CAM-B3LYP  | 0.55     | 12.83              |
| LC-BLYP    | 0        | 3.8                |
| LC-BLYP    | 0.15     | 6.63               |
| LC-BLYP    | 0.25     | 10.72              |
| LC-BLYP    | 0.35     | 16.83              |
| LC-BLYP    | 0.47     | 20.51              |
| LC-BLYP    | 0.55     | 19.3               |
| LC-BLYP    | 0.65     | 19.59              |
| LC-BLYP    | 0.75     | 19.97              |

### Section 3

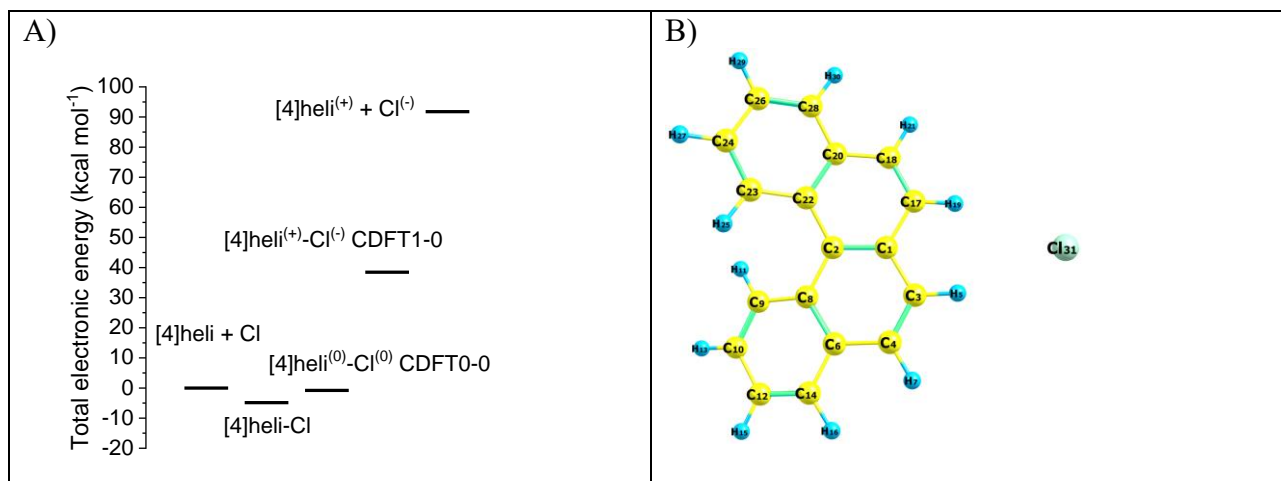

**Figure S3.1.** A) potential energy surface projection of points in energy corresponding to the following molecular systems, from left to right: *[4]helicene* + *Chlorine* atom at infinite distance, selected as zero energy; *[4]helicene*–*Chlorine* molecular adduct, with a C2–Cl<sub>31</sub> distance of 0.6029 nm. B) *[4]helicene*(0)–*Chlorine*(0) molecular adduct, CDFT calculation imposing zero net charge on both *[4]helicene* and chlorine; *[4]helicene*(+1)–*Chlorine*(-1) molecular adduct, CDFT calculation imposing *[4]helicene* cation and chlorine anion; *[4]helicene*(+1)+*Chlorine*(-1) at infinite distances, *[4]helicene* cation and chlorine anion

### Section 4

Equation 2: Energy vs. box length parameter  $L$  (compare equation (2) in the main text. Plotted just as an example  $E(L) = 1/L^2 - 1/L$

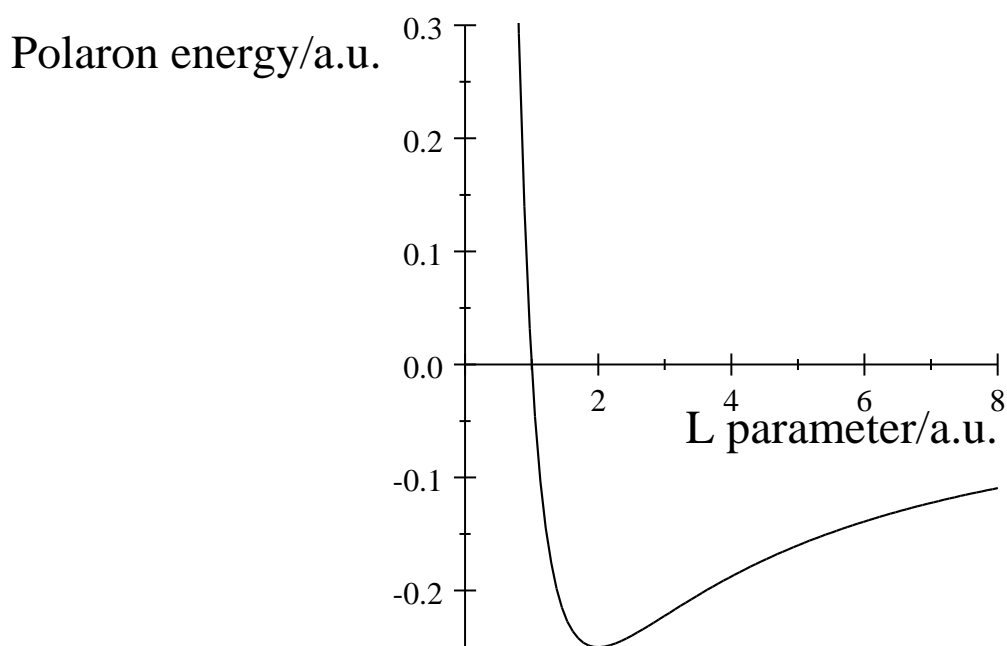

**Figure S4.1.** Plot of the 1D polaron energy as a function of the model box length (compare equation (2) main text for further details)
